# Supplementary material
Source: publisher figshare collection journal article supplement (https://karger.figshare.com/ndownloader/files/30468918)
Supplement: Supplementary file 1 [file 30468918]

**Supplementary table 3:** Comparison of CRP between diagnosis, sex, age, smoking status and disease duration within a medication group

| **Parameter** | **Lab marker** | **Medication** | **GMR (95% CI)** | **p-value** |
| --- | --- | --- | --- | --- |
| Diagnosis (CD vs. UC) | CRP | Infliximab  Vedolizumab | 0.61 (0.36; 1.04)  0.87 (0.29; 2.60) | 0.07  0.81 |
| Sex (male vs. female) | CRP | Infliximab  Vedolizumab | 0.91 (0.56; 1.49)  0.93 (0.30; 2.89) | 0.71  0.90 |
| Age | CRP | Infliximab  Vedolizumab | 1.01 (0.99; 1.02)  1.02 (0.98; 1.06) | 0.55  0.42 |
| Smoker (yes vs. no) | CRP | Infliximab  Vedolizumab | 1.24 (0.71; 2.16)  1.02 (0.33; 3.20) | 0.46  0.97 |
| Smoker (ex vs. no) | CRP | Infliximab  Vedolizumab | 1.73 (0.88; 3.40)  1.64 (0.31; 8.75) | 0.11  0.57 |
| Disease duration | CRP | Infliximab  Vedolizumab | 0.99 (0.97; 1.01)  1.01 (0.94; 1.07) | 0.59  0.86 |
